# Supplementary material
Source: Springer Nature journal article supplement (https://www.springermedizin.de/resource/supplementary/12936_2012_2613_MOESM2_ESM.pdf/9545136)

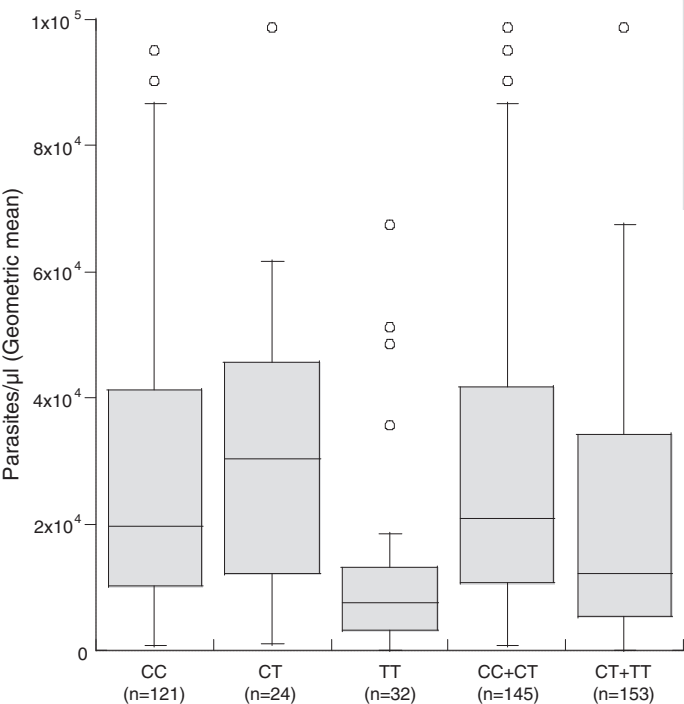

| Comparisons  | <i>P</i> value |
|--------------|----------------|
| CC vs. CT    | 0.017          |
| CT vs. TT    | 0.0032         |
| CC vs. TT    | 0.0012         |
| TT vs. CC+CT | 0.001          |
| CC vs. CT+TT | NS             |

Supplement: MOESM2 [file 9545136]
